# Supplementary material for: Single housing of juveniles accelerates early-stage growth but extends adult lifespan in African turquoise killifish
Source: publisher site journal article supplement (doi:10.18632/aging.206111), 2024-09-16
Supplement: Supplementary file [file aging-v16i18-206111-supplementary-material-SD1.pdf]

SUPPLEMENTARY FIGURES

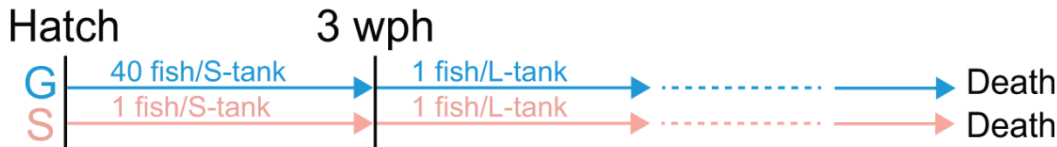

**Supplementary Figure 1. The schematic diagram of group- and single-housing conditions.** G: group-housed fish, S: single-housed fish. The hatched fish were kept at two different densities until three wph: 1 and 40 fish per S-tank. After three wph, all the fish were kept individually in L-tank.

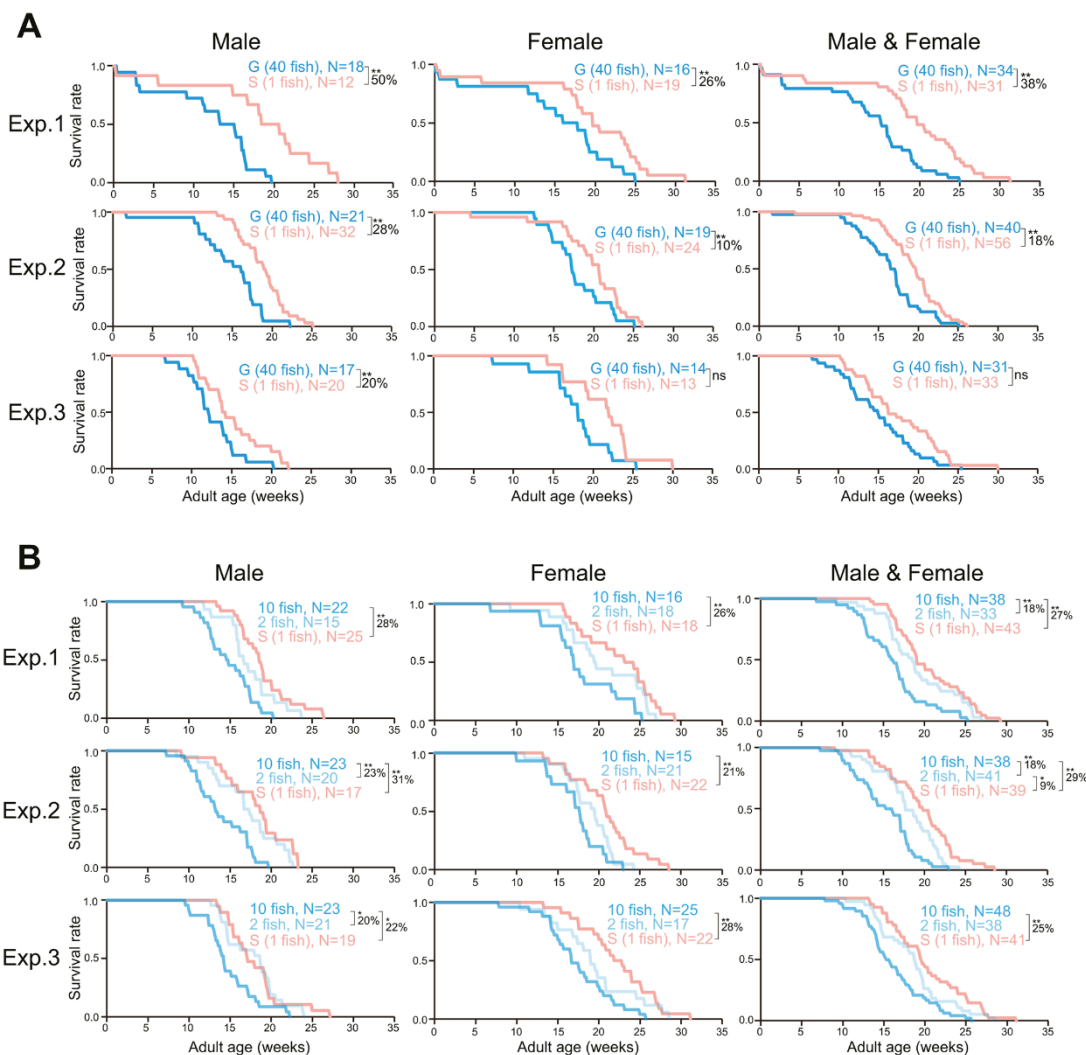

**Supplementary Figure 2. Kaplan–Meier survival curves for each of the three independent lifespan measurements.** The hatched fish were reared at a density of 1 or 40 fish per tank (A) or 1, 2, or 10 fish per tank (B) until 3 wph. After 3 wph, all the fish were reared individually. The age at which the fish reached the young adult stage was defined as zero weeks of adult age. The percentage indicates the rate of increase in the average lifespan. \*,  $p < 0.05$ ; \*\*,  $p < 0.01$  by log-rank test. G: group-housed fish, S: single-housed fish, N: the number of fish analyzed.

**Testis**

**Down**  
( $I > IV$ , FC1.5,  $padj < 0.01$ )

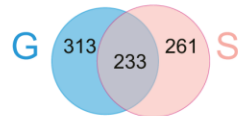

**Up**  
( $I < IV$ , FC1.5,  $padj < 0.01$ )

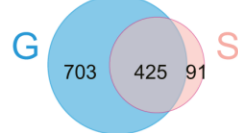

| 233 common down-regulated genes |                                                              |        |        |                                                                                                                                                                                                                                                                                                                              |
|---------------------------------|--------------------------------------------------------------|--------|--------|------------------------------------------------------------------------------------------------------------------------------------------------------------------------------------------------------------------------------------------------------------------------------------------------------------------------------|
| Term                            | Description                                                  | LogP   | Counts | Symbols                                                                                                                                                                                                                                                                                                                      |
| GO:0042273                      | ribosomal large subunit biogenesis                           | -7.90  | 14     | rplp0,npm1a,snu13b,ftsj3,rrp15,heatr3,rbm34,rs11d1,ddx28,utp25,tsr1,dkc1,thumpd1,farsa                                                                                                                                                                                                                                       |
| GO:0061061                      | muscle structure development                                 | -5.56  | 16     | dag1,mybphb,postnb,csrp1a,csrp2,pxna,fhl1a,itga6a,vcla,fermt2,pgm5,smarcd3b,col6a2,ogg1,jam2a,myom1b                                                                                                                                                                                                                         |
| GO:0031099                      | regeneration                                                 | -4.35  | 13     | cdh2,serpinh1b,hmgb1a,tgif1,csrp1a,mycb,vdac3,dpysl2b,bmpr2b,kdm6bb,utp25,col4a5,rpl221                                                                                                                                                                                                                                      |
| GO:0051146                      | striated muscle cell differentiation                         | -4.07  | 22     | dag1,mybphb,csrp1a,csrp2,vcla,pgm5,smarcd3b,ogg1,jam2a,myom1b,col6a2,epb41a,cnn1b,cdh2,etv5b,col4a5,sema7a,ap4s1,islr2,dpysl2b,rplp0,ddx28                                                                                                                                                                                   |
| GO:0044770                      | cell cycle phase transition                                  | -3.70  | 5      | meis1b,ccnp,skp2,cdk21,cdk6                                                                                                                                                                                                                                                                                                  |
| GO:0048729                      | tissue morphogenesis                                         | -3.38  | 23     | cdh2,sox9a,meis1b,fabp3,dag1,quo,apoa2,acta2,cdc3,fyna,csrp1a,pdgfra,fermt2,bmpr2b,ezrb,rpl2211,fhl1a,cldn5a,vcla,smarcd3b,kdm6bb,seraf,ogg1                                                                                                                                                                                 |
| GO:0060216                      | definitive hemopoiesis                                       | -3.34  | 5      | lpla,meis1b,mycb,dkc1,rpl2211                                                                                                                                                                                                                                                                                                |
| GO:0030198                      | extracellular matrix organization                            | -3.32  | 8      | serpinh1b,col4a5,postnb,crtap,col4a1,col18a1a,col5a2a,col5a1                                                                                                                                                                                                                                                                 |
| GO:0048568                      | embryonic organ development                                  | -2.87  | 16     | nog3,cdh2,sox9a,meis1b,fabp3,scarb2a,utp25,fstl1b,pdgfra,pacsin3,bmpr2b,cavin1b,kdm6bb,pxb1b,ogg1,mfap5                                                                                                                                                                                                                      |
| GO:0031102                      | neuron projection regeneration                               | -2.67  | 3      | hmgb1a,csrp1a,dpysl2b                                                                                                                                                                                                                                                                                                        |
| GO:0035118                      | embryonic pectoral fin morphogenesis                         | -2.62  | 4      | cdh2,sox9a,hoxc8a,etv5b                                                                                                                                                                                                                                                                                                      |
| GO:0051338                      | regulation of transferase activity                           | -2.57  | 14     | adcypap1b,fyna,pdgfra,prrc1,dnmt3ab,ccnp,dbnnd1,serpinh1b,scarb2a,fshr,tbc1d4,rangap1a,nfkbiaa,fxyd6l                                                                                                                                                                                                                        |
| GO:0006631                      | fatty acid metabolic process                                 | -2.47  | 15     | lpla,echdc2,acaa2,pck2,olah,acot17,zgc:158482,prtfdc1b,bhmt,nags,dnph1,gamt,fdxr,hibadhb,crtap                                                                                                                                                                                                                               |
| GO:0006694                      | steroid biosynthetic process                                 | -2.36  | 9      | star,hsd3b1,cyp11c1,star2,fdxr,igf2bp3,fshr,cdk21,zglp1                                                                                                                                                                                                                                                                      |
| GO:0009116                      | nucleoside metabolic process                                 | -2.28  | 4      | prtfdc1b,tk1,dnph1,bhmt                                                                                                                                                                                                                                                                                                      |
| GO:0031647                      | regulation of protein stability                              | -2.18  | 3      | meis1b,utp25,bag2                                                                                                                                                                                                                                                                                                            |
| GO:1901532                      | regulation of hematopoietic progenitor cell differentiation  | -2.06  | 3      | pdgfra,nfkbiaa,cdca7a                                                                                                                                                                                                                                                                                                        |
| 425 common up-regulated genes   |                                                              |        |        |                                                                                                                                                                                                                                                                                                                              |
| Term                            | Description                                                  | LogP   | Counts | Symbols                                                                                                                                                                                                                                                                                                                      |
| GO:0007017                      | microtubule-based process                                    | -11.68 | 47     | gas8,ccdc65,tuba1b,poc1b,ssx2ipa,efhc1,pafah1b1b,dzip1,cfap206,usp33,spag6,gle1,lrrc23,spire2,odad1,kif6,armc2,daw1,tllt9,ak9,rpgrb,mapre3a,tekt4,clasp1a,tllt7,bbs1,kif26ba,kif21b,rfx3,lca5,cfa p221,tbcelb,dnah3,kif16ba,ttc9c,cep89,clrn1,cep104,cep290,cfap126,wdpcp,iqub,arhgef9b,fxr1,agfg1a,si:ch211-260e23.9,smyd1b |
| GO:0007018                      | microtubule-based movement                                   | -10.50 | 23     | gas8,poc1b,ssx2ipa,pafah1b1b,cfap206,spag6,gle1,lrrc23,odad1,kif6,armc2,ak9,rpgrb,tekt4,bbs1,kif26ba,kif21b,rfx3,lca5,cfap221,dnah3,kif16ba,cep290                                                                                                                                                                           |
| GO:0001539                      | cilium or flagellum-dependent cell motility                  | -7.83  | 21     | gas8,ccdc65,efhc1,cfap206,spag6,armc2,daw1,tekt4,rfx3,dzip1,odad1,fxr1,agfg1a,buc,pafah1b1b,paqr5b,cfap221,spire2,spmap2,c d9a,dio2                                                                                                                                                                                          |
| GO:0032474                      | otolith morphogenesis                                        | -5.33  | 22     | gas8,ttc9c,lrrc23,daw1,cep290,wwc1,igfbp3,clrn1,ush1ga,whrna,poc1b,bcl6aa,dzank1,gle1,ubr3,rpgrb,ninl,dzip1,sec24d,sar1b,cep104,bbs1                                                                                                                                                                                         |
| GO:0070647                      | protein modification by small protein conjugation or removal | -4.60  | 31     | arih1,khlh17,mf41l,josd2,desi1a,otud3,zgc:66427,ube2r2,veli2,zgc:101783,ubr3,otud5a,sh3rf1,daw1,spsb4a,mf19a,socs5b,kkbbd8,pi as1b,ankib1a,asb15b,vcpip1,mf25,mf6,plaa,usp33,usp38,dis3l2,v ps37c,ptpn23a,fzr1b                                                                                                              |
| GO:0018107                      | peptidyl-threonine phosphorylation                           | -3.06  | 4      | hipk2,hipk3a,hipk3b,hipk1a                                                                                                                                                                                                                                                                                                   |
| GO:0002093                      | auditory receptor cell morphogenesis                         | -2.98  | 3      | clrn1,ush1ga,whrna                                                                                                                                                                                                                                                                                                           |
| GO:0003352                      | regulation of cilium movement                                | -2.79  | 3      | ccdc65,cfap206,daw1                                                                                                                                                                                                                                                                                                          |
| GO:0018200                      | peptidyl-glutamic acid modification                          | -2.79  | 3      | tllt9,tllt7,tllt10                                                                                                                                                                                                                                                                                                           |
| GO:0038127                      | ERBB signaling pathway                                       | -2.70  | 5      | cpne3,ptk2ba,socs5b,sh3rf1,fzr1b                                                                                                                                                                                                                                                                                             |
| GO:0042461                      | photoreceptor cell development                               | -2.57  | 8      | dzank1,rpgrb,cep290,ninl,bbs1,lca5,poc1b,pafah1b1b                                                                                                                                                                                                                                                                           |
| GO:0009896                      | positive regulation of catabolic process                     | -2.50  | 11     | cth1,fxr1,upf1,sh3rf1,socs5b,dis3l2,fzr1b,pnpla2,tent5c,zc3h14,ap oc1                                                                                                                                                                                                                                                        |
| GO:0070646                      | protein modification by small protein removal                | -2.29  | 5      | josd2,desi1a,otud3,otud5a,vcpip1                                                                                                                                                                                                                                                                                             |
| GO:0015849                      | organic acid transport                                       | -2.03  | 9      | slc6a19b,slc43a1a,pla2g10,slc1a1,fabp4b,slc1a3b,slc16a3a,slc38a2,slc16a4                                                                                                                                                                                                                                                     |
| GO:0048870                      | cell motility                                                | -2.02  | 19     | gas8,ccdc65,efhc1,cfap206,usp33,spag6,rnd1b,armc2,sh3rf1,itgb8,daw1,tekt4,ipxn,wwc1,apoc1,rfx3,ackr4b,zgc:174863,cc135.2                                                                                                                                                                                                     |

**Supplementary Figure 3. Venn diagrams of the DEGs (> 1.5-fold change,  $padj < 0.01$ ) between stage I and stage IV, and GO terms enriched in the common up/down-regulated genes in testes. G: group-housed fish, S: single-housed fish.**

## Ovary

Down  
( $I > IV$ , FC2,  $padj < 0.01$ )

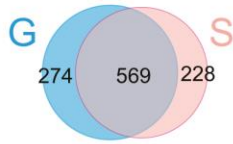

Up  
( $I < IV$ , FC2,  $padj < 0.01$ )

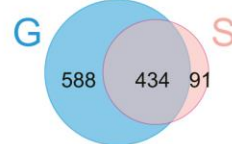

| Down-regulated genes |                                                          |       |        |                                                                                                                                                                                                                                                                                              |
|----------------------|----------------------------------------------------------|-------|--------|----------------------------------------------------------------------------------------------------------------------------------------------------------------------------------------------------------------------------------------------------------------------------------------------|
| Term                 | Description                                              | LogP  | Counts | Symbols                                                                                                                                                                                                                                                                                      |
| GO:1904888           | cranial skeletal system development                      | -4.07 | 18     | s1pr2,bptf,usp36,ptpn11a,ptpn11b,mapk3,nek1,taok2a,furina,hdac4,chn7,vcpip1,josd1,usp37,si:dkey-88l16.3,taok2b,mosmoa,map2k7                                                                                                                                                                 |
| GO:0098657           | import into cell                                         | -4.06 | 23     | scarb2a,itsn1,necap1,slc12a2,gapvd1,slc7a3a,eea1,csnk1g1,slc27a4,dennd1a,dnm2a,epn2,slc38a2,inpp5f,epn1b,slc9a6a,epn3a,slc9a1b,eps15,si:dkey-88l16.3,rab22a,nalf1a,pla2r1                                                                                                                    |
| GO:0032869           | cellular response to insulin stimulus                    | -4.02 | 6      | cpeb1b,insig1,ipin2,si:ch73-335l21.1,pik3r3b,irs4a                                                                                                                                                                                                                                           |
| GO:0050732           | negative regulation of peptidyl-tyrosine phosphorylation | -3.63 | 3      | cbl,cadm4,zfyve28                                                                                                                                                                                                                                                                            |
| GO:0034248           | regulation of amide metabolic process                    | -3.58 | 19     | cpeb1b,igf2bp3,casc3,ormdl3,kbtbd8,larp4b,ddx6,stk35,pdik11,ddx61,samd4a,larp4aa,tent5c,cnot3b,pum1,rc3h1b,tnrc6c1,ceff2,rbfox2                                                                                                                                                              |
| GO:0051128           | regulation of cellular component organization            | -3.48 | 37     | notch3,axin2,abhd17aa,trim37,gna13a,man1a2,baiap211a,c2cd5,rhogd,mapk3,clasp2,extl3,arhgap17a,msnb,cttnbp2,tbc1d25,sema6cb,bicd2,sptbn2,col15a1b,pik3ca,figl1,clasp1a,camsap2a,plekhg2,cempip2,pld1b,dync1l2,limk1a,si:ch211-159i8.4,tgfa,plknb2b,si:ch211-176g13.8,ssh1a,slc12a2,nde1,myo5b |
| GO:0008610           | lipid biosynthetic process                               | -3.41 | 29     | tlcd3ba,insig1,elovl7a,abhd2a,ptdss1a,serinc5,ormdl3,scdb,acer3,lpcat1,selenoi,ipin2,efr3bb,pik3ca,gnpat,pld1b,agpat2,pik3r3b,cds1,gal3st3,plcg1,slc7a3a,mtmr9,plce1,plpp5,slc27a4,fam135a,mboat1,sgpp1b                                                                                     |
| GO:0051056           | regulation of small GTPase mediated signal transduction  | -3.18 | 25     | akap13,cadm4,arhgap17a,stard13a,dennd4c,ralgab,sipa1l3,arhgef18b,sipa111,cdc42se1,il17rd,waca,ptpn11a,tsc1a,prkcb,gpr137c,taok2a,sh3r1,riCTORA,uacab,dlg5a,cds1,zdhc17,taok2b,tsc1b                                                                                                          |
| GO:0032924           | activin receptor signaling pathway                       | -3.18 | 4      | acvr1ba,smad2,prex1,tgfb1b                                                                                                                                                                                                                                                                   |
| GO:0043087           | regulation of GTPase activity                            | -2.90 | 25     | ralgps2,tbc1d16,tbc1d25,vav2,ralgab,prex1,rab3gap1,ralgds,agap1,tbc1d2b,plknb2b,hdr,uacab,scarb2a,axin2,trim37,cbl,si:dkey-7n6.2,cnny,dot1l,crtc3,zfyve28,cnjl,ctac,bcl10                                                                                                                    |
| GO:0016579           | protein deubiquitination                                 | -2.78 | 25     | usp36,mindy2,stamp1,vcpip1,josd1,usp37,zbtb16a,trim37,klhl17,ube2h,cdc34a,prkcb,wdr32,uhrf1,rbp6,cbl,rnf157,sh3r1,dunc1d4,mf19a,rc3h1b,kbtbd8,herc56.1,smurf2,ube2g1b                                                                                                                        |
| GO:0022600           | digestive system process                                 | -2.61 | 4      | uhrf1,dot1l,myo5b,chn7                                                                                                                                                                                                                                                                       |
| GO:0006468           | protein phosphorylation                                  | -2.56 | 20     | acvr1ba,rps6ka1,rps6ka3a,prkcb,stk10,stk24b,csnk1g1,taok2a,wnk1b,prkacbb,hpk3a,lmtk2,cdc42bpap,stk35,pdik11,tgfb1b,taok2b,srms,mast3b,wnk2                                                                                                                                                   |
| GO:0003094           | glomerular filtration                                    | -2.49 | 5      | myh9a,col4a4,tbc1d8b,farp1,plce1                                                                                                                                                                                                                                                             |
| GO:0060627           | regulation of vesicle-mediated transport                 | -2.46 | 10     | notch3,c2cd5,syt11a,arhgap1,msnb,rims1b,inpp5f,rab27a,rab8a,pld1b                                                                                                                                                                                                                            |
| GO:0034764           | positive regulation of transmembrane transport           | -2.43 | 4      | c2cd5,wnk1b,ctac,wnk2                                                                                                                                                                                                                                                                        |
| GO:0051254           | positive regulation of RNA metabolic process             | -2.37 | 30     | srfa,smad2,tefa,ncoa2,ell2,waca,cnot3b,cnt1,smarcc1a,thrap3b,znf296,zgc:110158,rc3h1b,ipin2,1nrc6c1,tfeb,znf827,mll1a,maml1,arid1b,crtc3,samd4a,hmbox1b,atad2b,lef1,igf2bp3,zbtb16a,tent5c,larp4b,larp4aa                                                                                    |
| GO:0015914           | phospholipid transport                                   | -2.35 | 6      | pilpnm3,atp11c,mfsd2ab,atp11a,pitpnc1a,pitpnb                                                                                                                                                                                                                                                |
| GO:0003002           | regionalization                                          | -2.34 | 26     | acvr1ba,nr6a1a,smad2,lef1,hey1,axin2,il17rd,rbm14a,bptf,ptpn11a,man1a2,tsc1a,tle5,pum1,rbm14b,pnhd,lmo7b,frmd8,map2k7,rpbj,furina,cempip2,chn7,ilgl1,cdc42se1,ahcy1                                                                                                                          |
| GO:0040007           | growth                                                   | -2.26 | 15     | acvr1ba,smad2,lef1,tlcd3ba,ap1g1,gna13a,ptpn11a,plk4,kif1b,plcg1,col4a6,myo9ab,kdm6bb,myo5b,mgat5                                                                                                                                                                                            |
| Up-regulated genes   |                                                          |       |        |                                                                                                                                                                                                                                                                                              |
| Term                 | Description                                              | LogP  | Counts | Symbols                                                                                                                                                                                                                                                                                      |
| GO:0006412           | translation                                              | -12.8 | 38     | eef1a11,rack1,rpl3,rpl10a,rpl23a,rplp2,eef1a1a,rps14,rpl9,rpl6,rps15,rps27a,rpl13,faua,rps19,rpsa,rpl18a,rps24,rps2,rps11,rpl37,rpl39,rpl35a,rps6,rpl18,eif3ha,zgc:114188,rps27.1,rpl32,rps16,rps8b,gpx1a,chac1,ece1,sptlc2b,tlcd3bb,galcib,acot17                                           |
| GO:0006119           | oxidative phosphorylation                                | -10.6 | 18     | CYTB,ND1,ND2,ND3,ND6,COX1,COX2,COX3,cox4i2,nduf6b,cox5a,cox8a,sdhaf2,atp5f1e,ugp2b,aldocb,hk2,rpl37                                                                                                                                                                                          |
| GO:0000028           | ribosomal small subunit assembly                         | -5.4  | 21     | rps14,rps15,rps19,rpsa,rps27.1,rpl23a,rpl6,rps16,rps8b,rpl10a,rpl7a,rpl35a,gata4,csf1ra,sparc,arpc1b,rpl18,ada2b,slc7a7,eif3ha,rac2                                                                                                                                                          |
| GO:0002376           | immune system process                                    | -5.0  | 33     | psmb9a,stat1a,pycard,csf1ra,psmb13a,sparc,ctsla,rpl10a,arpc1b,ifl30a,rps14,ctss2.2,mhc2dgb,rps19,irf9,rac2,rpl35a,accr10,rpl18,c1qc,ch25h,c1qa,rps27.1,cp,mhc2d8.46a,cd276,b2ml,tnfsf14,ccl38.6,ninj1,ccl34a.4,ccl19a.2                                                                      |
| GO:1901658           | glycosyl compound catabolic process                      | -3.76 | 5      | ada,fuca2,ada2b,gusb,aprt                                                                                                                                                                                                                                                                    |
| GO:0030595           | leukocyte chemotaxis                                     | -3.30 | 36     | csf1ra,rac2,ch25h,ccl38.6,ninj1,ccl34a.4,ccl19a.2,pycard,sgk1,fn1b,gmfb,ccr10,lrrc15,c5ar1,stat1a,anxa1a,il12bb,nfe2l2a,cpne3,cyp7a1,sh3bp4a,akr1a1a,grb10b,ifngr2,crfb2,cd276,hmxo1a,asip1,nupr1b,serp2,rbp4,COX1,dio2,gadd45ba,chac1,si:ch1073-406l10.2                                    |
| GO:0009145           | purine nucleoside triphosphate biosynthetic process      | -3.26 | 15     | nme2b.1,nme7,ATP6,COX1,atp5f1e,aldocb,hk2,aprt,ada,adss2,ada2b,ugp2b,uap111,rkbs,acot17                                                                                                                                                                                                      |
| GO:2000027           | regulation of animal organ morphogenesis                 | -2.98 | 4      | csf1ra,kif2b,church1,rspo3                                                                                                                                                                                                                                                                   |
| GO:0051336           | regulation of hydrolase activity                         | -2.59 | 13     | pycard,scarb2a,ctsla,ctss2.2,mcl1b,kng1,serpinb11,arhgef19,si:ch211-247j9.1,apoc1,ccl38.6,ccl34a.4,ccl19a.2                                                                                                                                                                                  |
| GO:0010876           | lipid localization                                       | -2.53 | 13     | rbp4,apoeb,fabp7a,fabp6,apoa4a,slc5a8l,esy1a,spns3,pla2g1b,plin2,gltpd2a,npc111,acp7                                                                                                                                                                                                         |
| GO:0002181           | cytoplasmic translation                                  | -2.51 | 8      | rplp2,rpl6,rpsa,rpl35a,eif3ha,rpl10a,rpl23a,rpl7a                                                                                                                                                                                                                                            |
| GO:1901615           | organic hydroxy compound metabolic process               | -2.50 | 13     | apoeb,aldh1a2,dio2,rth1,dhcr7,cyp7a1,tpk1,ch25h,apoa4a,sptlc2b,comtb,ece1,hsd17b14                                                                                                                                                                                                           |
| GO:0015671           | oxygen transport                                         | -2.46 | 3      | si:ch211-5k111.8,cygb2,hbbe1.3                                                                                                                                                                                                                                                               |
| GO:0002399           | MHC class II protein complex assembly                    | -2.46 | 3      | mhc2dgb,mhc2d8.46a,b2ml                                                                                                                                                                                                                                                                      |
| GO:0051014           | actin filament severing                                  | -2.32 | 10     | gsna,capbg,gmfb,pfn2b,sptan1,hcls1,si:ch73-95l15.5,zgc:154093,arhgef19,rhof                                                                                                                                                                                                                  |
| GO:0000041           | transition metal ion transport                           | -2.05 | 5      | slc39a13,tcn2,fnh27,slc31a2,heph1b                                                                                                                                                                                                                                                           |
| GO:0002521           | leukocyte differentiation                                | -2.00 | 6      | csf1ra,rpl10a,arpc1b,rac2,ada2b,slc7a7                                                                                                                                                                                                                                                       |

Supplementary Figure 4. Venn diagrams of the DEGs ( $> 2$ -fold change,  $padj < 0.01$ ) between stage I and stage IV, and GO terms enriched in the common up/down-regulated genes in ovaries. G: group-housed fish, S: single-housed fish.



Male

Down  
( $G1 > G6$ ,  $S2 > S6$ ; FC3,  $padj < 0.01$ )

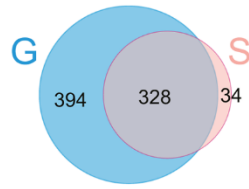

Up  
( $G1 < G6$ ,  $S2 < S6$ ; FC3,  $padj < 0.01$ )

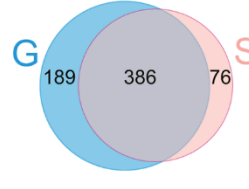

| common down-regulated genes |                                                                           |        |        |                                                                                                                                                                                                                                                                                 |
|-----------------------------|---------------------------------------------------------------------------|--------|--------|---------------------------------------------------------------------------------------------------------------------------------------------------------------------------------------------------------------------------------------------------------------------------------|
| Term                        | Description                                                               | LogP   | Counts | Symbols                                                                                                                                                                                                                                                                         |
| GO:0007420                  | brain development                                                         | -7.96  | 27     | dla,dlb,neurog1,pou3f3b,pou3f3a,pou3f1,eya1,asc11a,asc11b,otx2b,sox11a,robo2,pax6b,sox19b,tfap2a,ptprsa,meis2a,neurod4,tal2,pou4f2,her12,lhx9,lhx2b,notch1b,foxn4,ncanb,chn7                                                                                                    |
| GO:0032989                  | cellular anatomical entity morphogenesis                                  | -7.86  | 32     | desma,mef2d,hsp90aa1.1,elav4,scn8aa,robo2,ttn.2,tnika,lamb2,tardbpa,lhx9,myo18ab,kif5aa,wfs1a,plxna3,chn7,flnbc,col19a1,lhx2b,si:ch211-15918.4,notch1b,ttn.1,cyflp2,ptprdb,neurog1,asc11a,neurod4,fryb,map4l,cdh15,cdh26.1,sox11a                                               |
| GO:0071698                  | olfactory placode development                                             | -6.73  | 11     | neurog1,tfap2a,neurod4,tfap2c,lrrn1,chn7,eya1,wfs1a,dla,pax6b,sox19b                                                                                                                                                                                                            |
| GO:0007626                  | locomotory behavior                                                       | -6.21  | 13     | desma,scn8aa,slc1a2b,tardbpa,slc6a9,wfs1a,sv2a,flnbc,gabra1,flnca,chata,chn7,lhx2b                                                                                                                                                                                              |
| GO:0031034                  | myosin filament assembly                                                  | -5.76  | 21     | mef2d,hsp90aa1.1,ttn.2,ttn.1,desma,lamb2,tardbpa,mymk,mylpfb,itga6a,myo18ab,popdc2,mat2aa,flnbc,si:dkeyp-69b9.3,limch1a,xirp2a,scn4ba,flnca,xirp2b,kifc1                                                                                                                        |
| GO:0050767                  | regulation of neurogenesis                                                | -5.60  | 15     | neurog1,asc11a,asc11b,elav1,robo2,neurod4,hes6,her12,ncanb,plxna3,chn7,mymk,thrab,apc2,igf2bp3                                                                                                                                                                                  |
| GO:0042391                  | regulation of membrane potential                                          | -5.46  | 11     | scn8aa,slc6a9,gabrg2,gna11a,scn4ba,sv2a,grin1a,gabra1,glra2,popdc2,ank3a                                                                                                                                                                                                        |
| GO:0007268                  | chemical synaptic transmission                                            | -4.81  | 18     | gria2b,gria3b,syt1a,slc6a9,gabrg2,syt2a,sv2a,slc12a5a,grin1a,gabra1,glra2,slc17a6b,chata,gjc4b,gja2,gje1a,dot11,apc2                                                                                                                                                            |
| GO:0045944                  | positive regulation of transcription by RNA polymerase II                 | -4.70  | 19     | neurog1,foxn4,asc11a,asc11b,mef2d,sox11a,pax6b,sox19b,meis2a,neurod4,abraa,thrab,kmt2cb,si:dkeyp-69b9.3,hsp90aa1.1,igf2bp3,celf3a,scamp5a,eya1                                                                                                                                  |
| GO:0006836                  | neurotransmitter transport                                                | -4.41  | 22     | syt1a,slc6a1b,slc6a9,syt2a,sv2a,slc6a1a,slc17a6b,scn8aa,gabrg2,slc8a3,cacna2d1a,kcnma1a,slc12a5a,grin1a,gabra1,glra2,lrrc38b,cacng6b,trpm4a,gria2b,gria3b,scn4ba                                                                                                                |
| GO:0021772                  | olfactory bulb development                                                | -4.35  | 8      | neurog1,robo2,ptprsa,lhx2b,lrrn1,chn7,notch1b,tfap2a                                                                                                                                                                                                                            |
| GO:0007423                  | sensory organ development                                                 | -3.87  | 21     | dla,neurog1,foxn4,eya1,asc11a,asc11b,otx2b,sox11a,pax6b,tfap2a,meis2a,neurod4,lamb2,rab11fip4a,tfap2c,igf2bp1,wnk1b,wfs1a,chn7,lhx2b,cyflp2                                                                                                                                     |
| GO:0021514                  | ventral spinal cord interneuron differentiation                           | -3.82  | 10     | dla,foxn4,tal2,notch1b,dlb,her12,otud7b,neurog1,robo2,otx2b                                                                                                                                                                                                                     |
| GO:0008016                  | regulation of heart contraction                                           | -3.63  | 7      | desma,foxn4,ank2b,sorbs2a,popdc2,trdn,mymk                                                                                                                                                                                                                                      |
| GO:0006865                  | amino acid transport                                                      | -3.48  | 7      | slc1a2b,slc6a1b,slc6a9,slc6a1a,slc7a5,slc17a6b,slc38a3b                                                                                                                                                                                                                         |
| GO:1901888                  | regulation of cell junction assembly                                      | -3.24  | 4      | robo2,limch1a,macf1a,si:ch211-15918.4                                                                                                                                                                                                                                           |
| GO:0030902                  | hindbrain development                                                     | -3.07  | 8      | neurog1,asc11a,asc11b,otx2b,pax6b,tfap2a,notch1b,neurod4                                                                                                                                                                                                                        |
| GO:0048488                  | synaptic vesicle endocytosis                                              | -3.06  | 9      | syt1a,si:ch211-200p22.4,syt2a,dnm1a,kif5aa,slc17a6b,scamp5a,slc1a2b,cpne5a                                                                                                                                                                                                      |
| GO:0043484                  | regulation of RNA splicing                                                | -2.97  | 6      | cellf3a,hmg1a,nova2,ahnak,znf638,prx                                                                                                                                                                                                                                            |
| GO:0034762                  | regulation of transmembrane transport                                     | -2.93  | 12     | desma,scn8aa,slc1a2b,wnk1b,cacna2d1a,scn4ba,kcnma1a,cacng6b,ank3a,scamp5a,syt1a,syt2a                                                                                                                                                                                           |
| common up-regulated genes   |                                                                           |        |        |                                                                                                                                                                                                                                                                                 |
| Term                        | Description                                                               | LogP   | Counts | Symbols                                                                                                                                                                                                                                                                         |
| GO:0006956                  | complement activation                                                     | -10.75 | 42     | cfb,c8g,c8a,c1qc,c1qa,c7a,c7b,c4b,cd74a,mhc2dgb,fadd,mhc2d8.46a,b2ml,rac2,cxcr3.2,mmp9,gata1a,lgals9l3,wasb,grmb,cxcl8a,gapdh,f2,ctss2.2,fga,gh1,ctsl.1,tm4sf21b,ccl25b,c5ar1,ccl38.6,ccl35.2,psmb8a,psmb13a,alas2,ifi44f1,zgc:174904,casp3b,pglyrp6,mhc1uka,si:ch1073-280e3.1  |
| GO:0050878                  | regulation of body fluid levels                                           | -7.47  | 19     | cel.1,f2,fgb,serpind1,fga,fgg,prozb,cel.2,f9b,serpina10b,l71,mmp9,rac2,cxcl8a,cd74a,zp211,cxcr3.2,spire2                                                                                                                                                                        |
| GO:0044419                  | biological process involved in interspecies interaction between organisms | -6.71  | 35     | cfb,ncf1,ldlra,mmp9,rac2,c8a,mogat2,c7a,zgc:174904,lect2.1,c7b,marco,pglyrp6,cxcr3.2,ccl25b,cxcl8a,c1ql4l,ccl38.6,ccl35.2,asgr1a,f2,wasb,chnad,gh1,gcga,tcap,bglap,c5ar1,cd74b,cd74a,si:ch1073-280e3.1,si:ch211-160b11.4,si:ch1073-40610.2,si:dkeyp-9i23.4,si:dkeyp-9i23.4      |
| GO:0042632                  | cholesterol homeostasis                                                   | -6.54  | 27     | fabp2,ldlra,lipca,cyp7a1,ctep,abcg5,abcg8,apoa1a,apoea,dhrs9,cyp27a1.1,cyp8b1.1,srd5a2a,cahz,flth1a,hpxa,slc34a2b,fthl27,slc34a1a,adh8a,dio2,miox,crym,gata1a,alas2,rac2,casp3b,agxtb,gbib,gapdh,aldob,bhmt,aldoaa,alox5ap,eno3,acad11,lipca,hpda,cyp7a1,amdhd1,agxta,zgc:92040 |
| GO:0019752                  | carboxylic acid metabolic process                                         | -6.04  | 55     | pkmb,aldh8a1,haao,cbsa,scdb,zgc:153372,hsl,si:ch211-217a12.1,aldh11,cyp2x8,cel.1,adh8a,gpx1a,dnase1,hbba2,neu3.2,si:ch211-5k11.8,cel.2,nme2b.1,nme4,psmb8a,psmb13a,psma6l,ctss2.2,ctsc,ctsa,chia.3,ctsl.1,pglyrp6,ugp2b,amy2a1f,fbp2,slc3a1,gyg2,si:ch211-5k11.8,gpx1a,ncf1     |
| GO:0015669                  | gas transport                                                             | -4.86  | 7      | hbba1,cahz,mb,hbba2,si:ch211-5k11.8,gpx1a,ncf1                                                                                                                                                                                                                                  |
| GO:0170033                  | L-amino acid metabolic process                                            | -4.20  | 16     | agxtb,bhmt,hpda,amdhd1,agxta,zgc:92040,aldh8a1,cbsa,hsl,si:ch211-217a12.1,haao,adh8a,acad11,cyp7a1,miox,aldh11                                                                                                                                                                  |
| GO:0019882                  | antigen processing and presentation                                       | -4.06  | 12     | cd74b,cd74a,mhc2dgb,mhc2d8.46a,b2ml,gapdh,f2,grmb,fga,acanb,mep1a.2,agrp                                                                                                                                                                                                        |
| GO:0006641                  | triglyceride metabolic process                                            | -3.86  | 5      | lipca,mogat2,ctep,agpat9l,apoc1                                                                                                                                                                                                                                                 |
| GO:0006575                  | cellular modified amino acid metabolic process                            | -3.47  | 8      | bhmt,ckmt2a,gpx1a,dio2,gstf1a,crym,chn7,aldh11f                                                                                                                                                                                                                                 |
| GO:0000302                  | response to reactive oxygen species                                       | -3.41  | 12     | gpx1a,mb,apoda.1,apoda.2,adh8a,ldlra,cyp7a1,gh1,scdb,sult2st3,bglap,cxcl8a                                                                                                                                                                                                      |
| GO:0048251                  | elastic fiber assembly                                                    | -3.40  | 8      | mfap4.1,mfap4.12,mfap4.6,loxa,mmp9,paplnb,dpt,col10a1b                                                                                                                                                                                                                          |
| GO:0070887                  | cellular response to chemical stimulus                                    | -3.38  | 30     | agxtb,ucp1,cpb1,adh8a,hpxa,wasb,ldlra,amy2a1f,mb,cyp7a1,slc13a2,nr5a5,gh1,rac2,cyp2x8,zgc:153372,crfb2,cxcr3.2,ccl25b,cxcl8a,ccl38.6,agrp,ccl35.2,serp2,fbp2,dio2,lipca,scdb,sult2st3,bglap                                                                                     |
| GO:0044283                  | small molecule biosynthetic process                                       | -3.21  | 13     | apoa1a,agxtb,gbib,bhmt,alox5ap,lipca,cyp7a1,cyp27a1.1,agxta,fbp2,haao,cbsa,scdb                                                                                                                                                                                                 |
| GO:0050994                  | regulation of lipid catabolic process                                     | -3.14  | 3      | gh1,apoc1,si:ch1073-40610.2                                                                                                                                                                                                                                                     |
| GO:0002697                  | regulation of immune effector process                                     | -2.85  | 6      | cd74b,cd74a,mmp9,cxcl8a,cxcr3.2,gh1                                                                                                                                                                                                                                             |
| GO:0052547                  | regulation of peptidase activity                                          | -2.83  | 11     | psme2,ctss2.2,serpind1,ctsl.1,serpinb1,serpina7,serping1,apoc1,ccl25b,ccl38.6,ccl35.2                                                                                                                                                                                           |
| GO:0042445                  | hormone metabolic process                                                 | -2.77  | 6      | dhrs9,dio2,aldh8a1,srd5a2a,crym,nmbb                                                                                                                                                                                                                                            |
| GO:0016042                  | lipid catabolic process                                                   | -2.63  | 9      | cel.1,pla1a,acad11,lipca,cyp7a1,pla2g10,neu3.2,cel.2,pla2g1b                                                                                                                                                                                                                    |

Supplementary Figure 5. Venn diagrams of the DEGs (> 3-fold change,  $padj < 0.01$ ) between stage 1/2 and stage 6, and GO terms enriched in the common up/down-regulated genes in male juveniles. G: group-housed fish, S: single-housed.

## Female

Down  
( $G > G_6$ ,  $S_2 > S_6$ ; FC3,  $padj < 0.01$ )

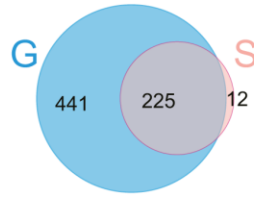

Up  
( $G < G_6$ ,  $S_2 < S_6$ ; FC3,  $padj < 0.01$ )

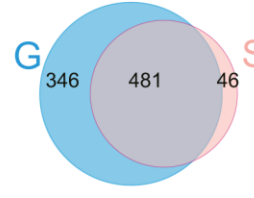

| common down-regulated genes |                                                                           |        |        |                                                                                                                                                                                                                                                                                                                                                                                                                                                                                                                                                                                                                                                                                                                                                                                                                     |
|-----------------------------|---------------------------------------------------------------------------|--------|--------|---------------------------------------------------------------------------------------------------------------------------------------------------------------------------------------------------------------------------------------------------------------------------------------------------------------------------------------------------------------------------------------------------------------------------------------------------------------------------------------------------------------------------------------------------------------------------------------------------------------------------------------------------------------------------------------------------------------------------------------------------------------------------------------------------------------------|
| Term                        | Description                                                               | LogP   | Counts | Symbols                                                                                                                                                                                                                                                                                                                                                                                                                                                                                                                                                                                                                                                                                                                                                                                                             |
| GO:0061061                  | muscle structure development                                              | -8.69  | 22     | desma,myog,mef2d,hsp90aa1.1,ttn.2,mat2aa,lamb2,tardbpa,rbox1,mylfb,ltga6a,flncb,si:dkeyp-69b9.3,nrap,popdc2,mef2cb,ttn.1,limch1a,xirp2a,scn4ba,flnca,xirp2b                                                                                                                                                                                                                                                                                                                                                                                                                                                                                                                                                                                                                                                         |
| GO:0032989                  | cellular anatomical entity morphogenesis                                  | -7.79  | 24     | desma,mef2d,hsp90aa1.1,elavl4,scn8aa,ttn.2,lamb2,tardbpa,lhx9,wfs1a,plxna3,flncb,col19a1,nrap,lhx2b,notch1b,ttn.1,ptprdb,her4.2,cdh15,cdh26.1,neurog1,neurod4,sox11a                                                                                                                                                                                                                                                                                                                                                                                                                                                                                                                                                                                                                                                |
| GO:0071698                  | olfactory placode development                                             | -7.69  | 16     | neurog1,tfap2a,neurod4,tfap2c,lrmm1,eya1,wfs1a,sox11a,meis2a,col27a1b,plxna3,popdc2,mef2cb,grhl2b,pax6b,rab11fp4a                                                                                                                                                                                                                                                                                                                                                                                                                                                                                                                                                                                                                                                                                                   |
| GO:0007420                  | brain development                                                         | -5.04  | 20     | neurog1,pou3f1,eya1,ascl1b,obx2b,sox11a,pax6b,tfap2a,ptprsa,meis2a,neurod4,lhx9,lhx2b,notch1b,grhl2b,lamb2,rab11fp4a,tfap2c,igt2bp1,wfs1a                                                                                                                                                                                                                                                                                                                                                                                                                                                                                                                                                                                                                                                                           |
| GO:0007626                  | locomotory behavior                                                       | -5.04  | 9      | desma,scn8aa,tardbpa,wfs1a,flncb,nrap,flnca,chata,lhx2b                                                                                                                                                                                                                                                                                                                                                                                                                                                                                                                                                                                                                                                                                                                                                             |
| GO:0043484                  | regulation of RNA splicing                                                | -5.01  | 7      | ceif3a,hmga1a,rbfox11,nova2,ahnak,znf638,prx                                                                                                                                                                                                                                                                                                                                                                                                                                                                                                                                                                                                                                                                                                                                                                        |
| GO:0045944                  | positive regulation of transcription by RNA polymerase II                 | -4.60  | 19     | myog,neurog1,ascl1b,mef2d,sox11a,pax6b,meis2a,neurod4,thrab,si:dkeyp-69b9.3,mef2cb,elavl3,hes6,plxna3,her4.2,hsp90aa1.1,ceif3a,larp4b,eya1                                                                                                                                                                                                                                                                                                                                                                                                                                                                                                                                                                                                                                                                          |
| GO:0021536                  | diencephalon development                                                  | -4.42  | 8      | neurog1,eya1,pax6b,neurod4,lhx9,lhx2b,ptprsa,lrmm1                                                                                                                                                                                                                                                                                                                                                                                                                                                                                                                                                                                                                                                                                                                                                                  |
| GO:0048738                  | cardiac muscle tissue development                                         | -4.03  | 13     | ttn.2,mat2aa,rbfox11,nrap,mef2cb,ttn.1,mef2d,dnmt3ba,thrab,kdm6bb,plxna3,flncb,popdc2                                                                                                                                                                                                                                                                                                                                                                                                                                                                                                                                                                                                                                                                                                                               |
| GO:0034765                  | regulation of monoatomic ion transmembrane transport                      | -3.82  | 14     | desma,scn8aa,cacna2d1a,scn4ba,kcma1a,cacng1b,scn4aa,cacng6b,ano1a,slc6a1b,ga,brg2,gira2,gria2b,gria3b                                                                                                                                                                                                                                                                                                                                                                                                                                                                                                                                                                                                                                                                                                               |
| GO:0008016                  | regulation of heart contraction                                           | -3.61  | 5      | desma,ank2b,sorbs2a,popdc2,trdn                                                                                                                                                                                                                                                                                                                                                                                                                                                                                                                                                                                                                                                                                                                                                                                     |
| GO:0048934                  | peripheral nervous system neuron differentiation                          | -3.37  | 4      | neurog1,notch1b,her4.2,tfap2a                                                                                                                                                                                                                                                                                                                                                                                                                                                                                                                                                                                                                                                                                                                                                                                       |
| GO:0110020                  | regulation of actomyosin structure organization                           | -3.20  | 3      | thrab,limch1a,nrap                                                                                                                                                                                                                                                                                                                                                                                                                                                                                                                                                                                                                                                                                                                                                                                                  |
| GO:0042391                  | regulation of membrane potential                                          | -2.83  | 6      | scn8aa,gabrg2,scn4ba,scn4aa,gira2,popdc2                                                                                                                                                                                                                                                                                                                                                                                                                                                                                                                                                                                                                                                                                                                                                                            |
| GO:0034330                  | cell junction organization                                                | -2.82  | 13     | ptprsa,tardbpa,gabrg2,cdh15,cdh26.1,ppfia4,ptprdb,notch1b,si:ch73-74h11.1,lamb2,ltga6a,frem3,col28a2a                                                                                                                                                                                                                                                                                                                                                                                                                                                                                                                                                                                                                                                                                                               |
| GO:0006936                  | muscle contraction                                                        | -2.15  | 4      | desma,gja2,scn4ba,myhb                                                                                                                                                                                                                                                                                                                                                                                                                                                                                                                                                                                                                                                                                                                                                                                              |
| GO:1902476                  | chloride transmembrane transport                                          | -2.11  | 3      | ano1a,gabrg2,gira2                                                                                                                                                                                                                                                                                                                                                                                                                                                                                                                                                                                                                                                                                                                                                                                                  |
| GO:0030198                  | extracellular matrix organization                                         | -2.09  | 5      | lamb2,col27a1b,adamts12,col28a2a,colq                                                                                                                                                                                                                                                                                                                                                                                                                                                                                                                                                                                                                                                                                                                                                                               |
| common up-regulated genes   |                                                                           |        |        |                                                                                                                                                                                                                                                                                                                                                                                                                                                                                                                                                                                                                                                                                                                                                                                                                     |
| Term                        | Description                                                               | LogP   | Counts | Symbols                                                                                                                                                                                                                                                                                                                                                                                                                                                                                                                                                                                                                                                                                                                                                                                                             |
| GO:0010876                  | lipid localization                                                        | -11.05 | 28     | apoa1a,fabp2,fabp10a,ldlra,pla2g12b,fabp6,pla2g10,cd36,fabp4a,cefp,apoa4a,apoea,abcg5,vtg6,vtg2,ldah,rbp2a,afp4,apoc2,rbp7b,apoa4b.2,pla2g1b,apol,abcg8,apoda.2,star2,slc13a2,slc25a5                                                                                                                                                                                                                                                                                                                                                                                                                                                                                                                                                                                                                               |
| GO:0071391                  | cellular response to estrogen stimulus                                    | -9.61  | 33     | ucp1,esr1,fbp1b,ssr1,amy2a1,aqp12,vtg6,vtg2,nupr1b,fam20cl,cbp1,adh8a,wasb,rhogb,ldlra,mb,slc13a2,lt4h,nf5a5,cyp2x8,nt5c211,cyp2n13,cyp2x9,crfb2,prdx2,hmox1a,cxcr3.2,cc125b,cc138.6,cc135.2,serp2,dio2,cd36                                                                                                                                                                                                                                                                                                                                                                                                                                                                                                                                                                                                        |
| GO:0006956                  | complement activation                                                     | -8.27  | 50     | cfb,c8g,c8a,c1qc,c1qa,c7a,c4b,gata1a,cd74b,psmb8a,psmb13a,alas2,alas1,wasb,arpc1b,ifl90a,ctss2.2,mhc2dgb,vtb,lt4h,cd36,ctsl.1,ada,zgc:110239,ifi44f1,wfcd2,slc15a2,zgc:174904,casp3b,mhc2d8.46a,pglyrp6,mhc1uka,prdx2,b2ml,cxcr3.2,irf1b,cc125b,cc138.6,cc135.2,fgl1,lgals9l3,grmb,mmp9,hmox1a,gapdh,f2,tm4sf21b,prl,c5ar1,si:ch211-5k11.8                                                                                                                                                                                                                                                                                                                                                                                                                                                                          |
| GO:0055088                  | lipid homeostasis                                                         | -7.74  | 40     | apoa1a,fabp2,ldlra,pla2g12b,pnpla3,cefp,apoa4a,apoea,abcg5,apoa4b.2,tm6sf2b,abcg8,h,sd17b1,fxdc2,cyp8b1.1,hsd3b1,apof,star2,cahz,ftb1a,nherf1a,ftb27,ftb31,prl,slc34a1a,fah,adh8a,dio2,tip1b,crym,gata1a,alas2,alas1,casp3b,prdx4,prdx2,afp4,apoc2,apoc1,apolpkir,gnpb,gapdh,aldob,bhmt,fah,cel.1,adh8a,aldoaa,gpx1a,eno3,upp2,hpda,amdhd11,hao1a,amdhd2,hoga1,lt4h,uox,pnpla3,cd36,ada,dnase1,hbba2,pkmb,aldh8a1,rfesd,urad,tip1b,tat,cel.2,prdx4,prdx2,hmox1a,aldh11,psmb8a,psmb13a,psma6l,ctss2.2,ctsc,lgmn,ctsb3a,chi a.3,ctsl.1,ctsz,zgc:110239,apoc2,pglyrp6,papss2b,alox5ap,cyp2x8,agxta,cyp2n13,scdb,a,cot17,cyp2x9,ugp2b,cox4i2,tcap,gyg2,cox8b,cox7a1,ccn6,nme2b.1,fbp1b,amy2a1,b3gat1a,si,uap1,pnp4b,ckmt1,ckmt2a,pla2g12b,pla2g10,gpat3,cefp,pla2g1b,rarres3,plaat11,thi3a.1,ogal,fut9a,si:ch211-5k11.8 |
| GO:0044282                  | small molecule catabolic process                                          | -4.69  | 15     | fah,adh8a,upp2,hpda,amdhd11,hao1a,amdhd2,hoga1,uox,ada,aldh8a1,urad,tip1b,tat,aldh11                                                                                                                                                                                                                                                                                                                                                                                                                                                                                                                                                                                                                                                                                                                                |
| GO:0042632                  | cholesterol homeostasis                                                   | -4.65  | 6      | fabp2,ldlra,pla2g12b,cefp,abcg5,abcg8                                                                                                                                                                                                                                                                                                                                                                                                                                                                                                                                                                                                                                                                                                                                                                               |
| GO:0044419                  | biological process involved in interspecies interaction between organisms | -4.35  | 34     | cfb,rhogb,ldlra,mmp9,lt4h,cd36,c8a,mogat2,wfcd2,slc15a2,c7a,zgc:174904,pglyrp6,cxcr3.2,irf1b,cc125b,c1ql4l,cc138.6,cc135.2,asgr1a,dap,wasb,chad,gcga,tcap,prl,bglap,nupr1b,c5ar1,f2,si:ch1073-40610.2,si:dkeyp-9i23.4,si:dkeyp-9i23.4,si:ch1073-280e3.1                                                                                                                                                                                                                                                                                                                                                                                                                                                                                                                                                             |
| GO:0015669                  | gas transport                                                             | -4.34  | 13     | hbba1,cahz,mb,hbba2,gpx1a,prdx4,prdx2,gpx4a,mrsrb2,hmox1a,apoda.2,adh8a,si:ch211-5k11.8                                                                                                                                                                                                                                                                                                                                                                                                                                                                                                                                                                                                                                                                                                                             |
| GO:0006575                  | cellular modified amino acid metabolic process                            | -4.12  | 10     | ckmt1,bhmt,ckmt2a,gpx1a,dio2,gstt1a,crym,aldh9a1a.1,cdhd,aldh11                                                                                                                                                                                                                                                                                                                                                                                                                                                                                                                                                                                                                                                                                                                                                     |
| GO:0050878                  | regulation of body fluid levels                                           | -3.78  | 11     | f7i,cel.1,f2,cel.2,f9b,cbp2,fgl1,f7i,mmp9,lgmn,b3gat1a                                                                                                                                                                                                                                                                                                                                                                                                                                                                                                                                                                                                                                                                                                                                                              |
| GO:0030199                  | collagen fibril organization                                              | -3.63  | 20     | loxa,mmp9,dpt,col2a1a,loxl4,mibp2,mfap4.1,paplnb,col10a1b,mfap4.12,icp1,wasb,arpc1b,rhogb,evlb,scinlb,spire2,tcap,smyd1b,nanog                                                                                                                                                                                                                                                                                                                                                                                                                                                                                                                                                                                                                                                                                      |
| GO:0009410                  | response to xenobiotic stimulus                                           | -3.56  | 8      | esr1,cbp1,adh8a,cyp2x8,nt5c211,cyp2n13,cyp2x9,hmox1a                                                                                                                                                                                                                                                                                                                                                                                                                                                                                                                                                                                                                                                                                                                                                                |
| GO:0052547                  | regulation of peptidase activity                                          | -3.51  | 13     | psme2,ctss2.2,ctsl.1,serpinb1,zgc:110239,serpina7,serping1,si:ch211-262h13.5,apoc1,cc125b,cc138.6,cc135.2,si:ch211-5k11.8                                                                                                                                                                                                                                                                                                                                                                                                                                                                                                                                                                                                                                                                                           |
| GO:0006641                  | triglyceride metabolic process                                            | -3.36  | 10     | pnpla3,gpat3,mogat2,cefp,apoc1,si:ch1073-40610.2,cd36,ldlra,thrsp,tm6sf2b                                                                                                                                                                                                                                                                                                                                                                                                                                                                                                                                                                                                                                                                                                                                           |
| GO:0006880                  | intracellular sequestering of iron ion                                    | -3.23  | 6      | ftb1a,ftb27,ftb31,cd36,ldah,melft                                                                                                                                                                                                                                                                                                                                                                                                                                                                                                                                                                                                                                                                                                                                                                                   |
| GO:0046348                  | amino sugar catabolic process                                             | -3.08  | 4      | amdhd2,hoga1,chia.3,uap1                                                                                                                                                                                                                                                                                                                                                                                                                                                                                                                                                                                                                                                                                                                                                                                            |
| GO:0001775                  | cell activation                                                           | -2.86  | 10     | zp2.5,cd74b,f2,arpc1b,ada,zp2f1,prdx2,cxcr3.2,fgl1,zp3a.2                                                                                                                                                                                                                                                                                                                                                                                                                                                                                                                                                                                                                                                                                                                                                           |
| GO:0030388                  | fructose 1,6-bisphosphate metabolic process                               | -2.73  | 3      | fbp1b,aldob,aldoaa                                                                                                                                                                                                                                                                                                                                                                                                                                                                                                                                                                                                                                                                                                                                                                                                  |
| GO:0019882                  | antigen processing and presentation                                       | -2.56  | 4      | cd74b,mhc2dgb,mhc2d8.46a,b2ml                                                                                                                                                                                                                                                                                                                                                                                                                                                                                                                                                                                                                                                                                                                                                                                       |

Supplementary Figure 6. Venn diagrams of the DEGs (> 3-fold change,  $padj < 0.01$ ) between stage 1/2 and stage 6, and GO terms enriched in the common up/down-regulated genes in female juveniles. G: group-housed fish, S: single-housed.

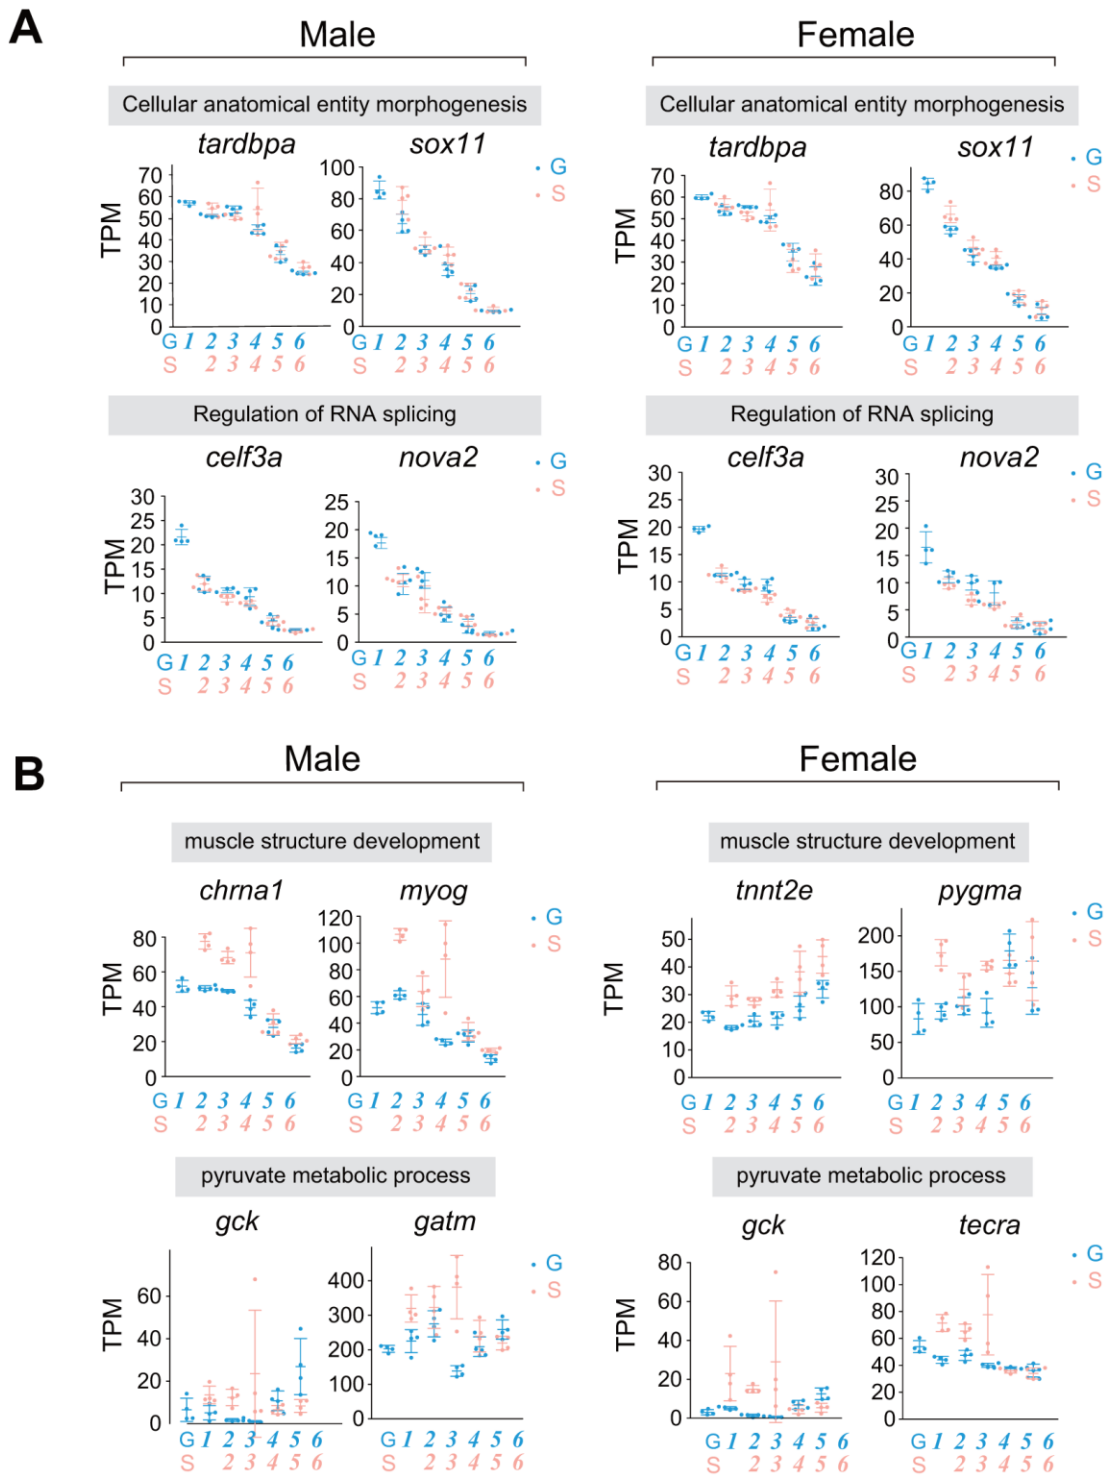

**Supplementary Figure 7. Changes in the expression of genes associated with GO terms that are enriched in the DEGs between group- and single-housed fish. (A)** Example of expression of the cellular anatomical entity morphogenesis/regulation of RNA splicing-associated genes that were enriched among the common DEGs (stage 1/2 vs. stage 6) between group- and single-housed fish. TPM values are shown. *tardbpa*, TAR DNA binding protein a; *sox11*, SRY-box transcription factor 11; *celf3a*, Elav-like family member 3a; *nova2*, NOVA alternative splicing regulator 2 **(B)** Example of the expression of muscle structure development/pyruvate metabolic process-associated genes that were enriched among the DEGs with higher expression in the single-housed fish than in the group-housed fish in stages 1-4. TPM values are shown. *chrna1*, cholinergic receptor, nicotinic, alpha 1; *myog*, myogenin; *tnnt2e*, troponin T2e; *pygma*, phosphorylase, glycogen, muscle A; *gck*, glucokinase; *gatm*, glycine amidinotransferase; *tecra*, trans-2,3-enoyl-CoA reductase a. **(A, B)** G: group-housed fish, S: single-housed fish.
