# Supplementary material for: Single housing of juveniles accelerates early-stage growth but extends adult lifespan in African turquoise killifish
Source: publisher site journal article supplement (doi:10.18632/aging.206111), 2024-09-16
Supplement: Supplementary file [file aging-v16i18-206111-supplementary-material-SD3.pdf]

**Supplementary Table 2. GO term analysis for DEGs (> 1.5-fold change, *padj* < 0.01) between group- and single-housed juveniles during stages 1-4 in males.**

| 446 down-regulated genes ( <i>G1-4</i> > <i>S2-4</i> , <i>FC1.5</i> , <i>padj</i> < 0.01) |                                                                |        |        |                                                                                                                                                                                                                                                                                                                                                                                                                                                                                                                     |
|-------------------------------------------------------------------------------------------|----------------------------------------------------------------|--------|--------|---------------------------------------------------------------------------------------------------------------------------------------------------------------------------------------------------------------------------------------------------------------------------------------------------------------------------------------------------------------------------------------------------------------------------------------------------------------------------------------------------------------------|
| Term                                                                                      | Description                                                    | LogP   | Counts | Symbols                                                                                                                                                                                                                                                                                                                                                                                                                                                                                                             |
| GO:0007601                                                                                | visual perception                                              | -34.62 | 68     | opn1lw1,opn1sw2,opn1sw1,prph2a,crybb1,gnat1,gnat2,opn1mw2,pdca,pde6ha,rom1a,pde6c,rom1b,cryba2b,crygn2,crygm5,crygn1,crygm3,crygs1,cryba1l1,rgra,crygs3,cryba4,crybb2,crybb3,crybb1l1,crybgx,crygm2b,crygm6,crygm11,crygm12,crygm2f,prph2b,grk1a,crygm2e,unc119b,arr3b,cryaa,slc17a6b,penka,lhfp13,ppef2a,scn8aa,glrb,slc6a9,gabrg2,sv2a,gabra1,glra2,vip,plaat1,mipa,adcyap1b,rpb4l,ppm1na,cdk5r1b,cdhr1a,cdk5r2a,ankrd33aa,igf2bp1,cadm1a,lbhl,impdh1a,rab11fip4a,cd74b,aldh1l1,si:dkey-57a22.15,si:ch73-167i17.6 |
| GO:0099536                                                                                | synaptic signaling                                             | -7.53  | 43     | snap25a,dlg1a,gria2b,penka,gria3b,syt1a,glrb,slc6a9,gabrg2,cplx2b,dtbb,syt2a,sv2a,slc12a5a,syn2b,grin1a,cplx4a,gabra1,glra2,slc17a6b,chata,ptprna,ptprn2,gabbr1a,gje1a,vip,scn8aa,slco1d1,slc5a1,slc13a2,slc6a1b,atp2b2,atp2b3b,slc39a4,scn3b,kcnma1a,atp13a2,slc4a7,slc6a1a,slc4a10a,lrrc38b,si:ch211-117c9.5,si:ch211-251b21.1                                                                                                                                                                                    |
| GO:0006836                                                                                | neurotransmitter transport                                     | -6.47  | 28     | snap25a,syt1a,slc6a1b,slc6a9,cplx2b,syt2a,sv2a,syn2b,slc6a1a,cplx4a,slc17a6b,ptprna,ptprn2,vip,scamp5a,scg5,chga,ctx1b,dnm2a,scn8aa,slc1a2b,pacsin1a,flot1a,scn3b,kcnma1a,unc119b,dpp6a,adcyap1b                                                                                                                                                                                                                                                                                                                    |
| GO:0009583                                                                                | detection of light stimulus                                    | -4.97  | 19     | opn1lw1,opn1sw2,opn1sw1,gnat1,gnat2,opn1mw2,rgra,rcvrn2,grk1b,scn8aa,ucpl1,igfbp1a,ddit4,kcnma1a,cryaa,si:dkey-1k23.3,cadm1a,ppef2a,si:ch73-167i17.6                                                                                                                                                                                                                                                                                                                                                                |
| GO:0006030                                                                                | chitin metabolic process                                       | -4.24  | 3      | chs1,chia.2,chia.3                                                                                                                                                                                                                                                                                                                                                                                                                                                                                                  |
| GO:0071248                                                                                | cellular response to metal ion                                 | -4.11  | 9      | slc13a2,syt1a,cpne4a,syt2a,cpne5a,atp13a2,tap2a,slc1a2b,chga                                                                                                                                                                                                                                                                                                                                                                                                                                                        |
| GO:1990778                                                                                | protein localization to cell periphery                         | -3.90  | 10     | ctx1b,prph2a,dlg1a,rom1a,rom1b,ank2b,prph2b,flot1a,arl13a,sgtb                                                                                                                                                                                                                                                                                                                                                                                                                                                      |
| GO:0008277                                                                                | regulation of G protein-coupled receptor signaling pathway     | -3.81  | 6      | pdca,pde6ha,grk1a,rgs9a,saga,arr3b                                                                                                                                                                                                                                                                                                                                                                                                                                                                                  |
| GO:0019882                                                                                | antigen processing and presentation                            | -3.73  | 8      | cd74b,mhc2dgb,mhc2d8.46a,b2ml,marchf1,flot1a,zgc:123297,lgals9l3                                                                                                                                                                                                                                                                                                                                                                                                                                                    |
| GO:0007626                                                                                | locomotory behavior                                            | -3.49  | 13     | snap25a,scn8aa,slc1a2b,camk1gb,slc6a9,sv2a,atp13a2,thns12,gabra1,chata,serpini1b,merb1,vip                                                                                                                                                                                                                                                                                                                                                                                                                          |
| GO:0010817                                                                                | regulation of hormone levels                                   | -3.41  | 9      | ptprna,ptprn2,dio2,scg5,chga,lratb.2,vip,pcsk2,slco1d1                                                                                                                                                                                                                                                                                                                                                                                                                                                              |
| GO:0046394                                                                                | carboxylic acid biosynthetic process                           | -3.22  | 12     | agxtb,alox5ap,gad1b,elov15,got1,agxta,asah2,gad2,abhd2b,thns12,hpda,prodha                                                                                                                                                                                                                                                                                                                                                                                                                                          |
| GO:0015849                                                                                | organic acid transport                                         | -3.16  | 16     | fabp2,slco1d1,slc1a2b,slc13a2,slc6a1b,slc6a9,slc3a1,slc6a1a,slc7a5,slc17a6b,si:ch211-117c9.5,slc16a1a,scn8aa,slc5a1,scn3b,slc2a1a                                                                                                                                                                                                                                                                                                                                                                                   |
| GO:0007254                                                                                | JNK cascade                                                    | -3.06  | 3      | mapk8ip2,si:ch211-45c16.2,mapk10                                                                                                                                                                                                                                                                                                                                                                                                                                                                                    |
| GO:0035970                                                                                | peptidyl-threonine dephosphorylation                           | -3.06  | 3      | ppm1na,ppm1kb,ppm1nb                                                                                                                                                                                                                                                                                                                                                                                                                                                                                                |
| GO:0050908                                                                                | detection of light stimulus involved in visual perception      | -2.94  | 3      | gnat1,gnat2,si:ch73-167i17.6                                                                                                                                                                                                                                                                                                                                                                                                                                                                                        |
| GO:0060078                                                                                | regulation of postsynaptic membrane potential                  | -2.87  | 15     | slc6a9,gabrg2,gabra1,glra2,clstn3,glrb,slc4a7,slc12a5a,slc4a10a,slc17a6b,gabbr1a,scn8aa,scn3b,sv2a,grin1a                                                                                                                                                                                                                                                                                                                                                                                                           |
| GO:0002455                                                                                | humoral immune response mediated by circulating immunoglobulin | -2.73  | 8      | cfb,c9,si:ch1073-280e3.1,cd74b,mhc2dgb,cadm1a,mhc2d8.46a,b2ml                                                                                                                                                                                                                                                                                                                                                                                                                                                       |
| GO:0035249                                                                                | synaptic transmission, glutamatergic                           | -2.45  | 4      | gria2b,gria3b,si:ch211-251b21.1,slc17a6b                                                                                                                                                                                                                                                                                                                                                                                                                                                                            |
| GO:1901890                                                                                | positive regulation of cell junction assembly                  | -2.27  | 3      | clstn3,flot1a,lrrc4bb                                                                                                                                                                                                                                                                                                                                                                                                                                                                                               |

---

**117 up-regulated genes (G1-4 < S2-4, FC1.5, padj < 0.01)**

---

| <b>Term</b> | <b>Description</b>                | <b>LogP</b> | <b>Counts</b> | <b>Symbols</b>                                                                                                     |
|-------------|-----------------------------------|-------------|---------------|--------------------------------------------------------------------------------------------------------------------|
| GO:0030198  | extracellular matrix organization | -10.73      | 15            | serpinh1b,col1a2,col1a1a,loxa,lum,col11a1b,col10a1a,col5a2a,p3h4,adamts12,col5a3a,col16a1,hsp90aa1.1,ttn.2,igfn1.4 |
| GO:0061061  | muscle structure development      | -5.92       | 11            | myog,hsp90aa1.1,chrna1,ttn.2,loxa,mymk,pygma,synpo2la,pgam2,myl2b,igfn1.4                                          |
| GO:0006457  | protein folding                   | -5.24       | 7             | hsp90aa1.1,fkbp10b,hsc70,fkbp9,ppil1,ptges3l,hspb9                                                                 |
| GO:0006090  | pyruvate metabolic process        | -3.93       | 6             | ldha,bpgm,pgam2,gck,pygma,gatm                                                                                     |
| GO:0031099  | regeneration                      | -2.69       | 7             | myog,serpinh1b,col1a1a,col10a1a,gck,chrna1,dio2                                                                    |

---

**Supplementary Table 3. GO term analysis for DEGs (> 1.5-fold change, *padj* < 0.01) between group- and single-housed juveniles during stages 1-4 in females.**

| <b>276 down-regulated genes (G1-4 &gt; S2-4, FC1.5, <i>padj</i> &lt; 0.01)</b> |                                        |             |               |                                                                                                                                                                                                                                                                                                                                                                          |  |
|--------------------------------------------------------------------------------|----------------------------------------|-------------|---------------|--------------------------------------------------------------------------------------------------------------------------------------------------------------------------------------------------------------------------------------------------------------------------------------------------------------------------------------------------------------------------|--|
| <b>Term</b>                                                                    | <b>Description</b>                     | <b>LogP</b> | <b>Counts</b> | <b>Symbols</b>                                                                                                                                                                                                                                                                                                                                                           |  |
| GO:0007601                                                                     | visual perception                      | -27.07      | 47            | opn1lw1,opn1sw2,opn1sw1,prph2a,crybb1,gnat1,gnat2,pde6ha,rom1a,cryba2b,crygn2,crygm5,crygn1,crygm3,crygs1,cryba1l1,crygs3,cryba4,crybb3,crybb1l1,crybgx,crygm2b,crygm6,crygmx11,si:ch73-167i17.6,grk1a,crygm2e,si:dkey-57a22.15,slc17a6b,scn8aa,glrb,slc6a9,gabrg2,sv2a,gabra1,adcyp1b,ppm1na,cdhr1a,cdk5r2a,ankrd33aa,igf2bp1,cadm1a,ndr1,lbhl,pax10,impdh1a,rab11fip4a |  |
| GO:0048477                                                                     | oogenesis                              | -5.47       | 10            | zp3b,buc,zar1,zp3a.1,zp3a.2,zar1l,zglp1,fbp6,dio2,cadm1a                                                                                                                                                                                                                                                                                                                 |  |
| GO:0006836                                                                     | neurotransmitter transport             | -4.59       | 15            | snap25a,syt1a,slc6a9,syt2a,sv2a,syn2b,slc17a6b,gria2b,glrb,gabrg2,slc12a5a,gabra1,ptprna,ptprn2,scn8aa                                                                                                                                                                                                                                                                   |  |
| GO:0009583                                                                     | detection of light stimulus            | -4.50       | 11            | opn1lw1,opn1sw2,opn1sw1,gnat1,gnat2,rcvrn2,scn8aa,ucp1,ucp3,cadm1a,si:ch73-167i17.6                                                                                                                                                                                                                                                                                      |  |
| GO:0008345                                                                     | larval locomotory behavior             | -4.33       | 8             | scn8aa,slc1a2b,thns12,gabra1,snap25a,camk1gb,slc6a9,sv2a                                                                                                                                                                                                                                                                                                                 |  |
| GO:0032940                                                                     | secretion by cell                      | -4.08       | 10            | snap25a,stx1b,scamp5a,ptprna,ptprn2,syt1a,syt2a,syn2b,ndr1,slc1a2b                                                                                                                                                                                                                                                                                                       |  |
| GO:0001678                                                                     | intracellular glucose homeostasis      | -3.77       | 4             | ptprna,ptprn2,hk2,ndr1                                                                                                                                                                                                                                                                                                                                                   |  |
| GO:0099003                                                                     | vesicle-mediated transport in synapse  | -3.37       | 7             | snap25a,syt1a,dnm2a,si:ch211-200p22.4,syt2a,slc17a6b,kif5aa                                                                                                                                                                                                                                                                                                              |  |
| GO:0031175                                                                     | neuron projection development          | -2.75       | 15            | elavl4,scn8aa,ncam1b,adcyp1b,gpm6aa,nrn1a,stmn4l,b3gat1a,cdk5r2a,pacsin1a,si:ch211-113g11.6,kif5aa,si:ch211-195b13.1,map4l,ndrg4                                                                                                                                                                                                                                         |  |
| GO:1990778                                                                     | protein localization to cell periphery | -2.33       | 5             | stx1b,prph2a,rom1a,ank2b,arl13a                                                                                                                                                                                                                                                                                                                                          |  |
| GO:0003333                                                                     | amino acid transmembrane transport     | -2.16       | 4             | slc1a2b,slc6a9,slc7a5,slc17a6b                                                                                                                                                                                                                                                                                                                                           |  |
| <b>115 up-regulated genes (G1-4 &lt; S2-4, FC1.5, <i>padj</i> &lt; 0.01)</b>   |                                        |             |               |                                                                                                                                                                                                                                                                                                                                                                          |  |
| <b>Term</b>                                                                    | <b>Description</b>                     | <b>LogP</b> | <b>Counts</b> | <b>Symbols</b>                                                                                                                                                                                                                                                                                                                                                           |  |
| GO:0030198                                                                     | extracellular matrix organization      | -13.47      | 17            | serpinh1b,colla2,colla1a,postnb,postna,loxa,lum,zgc:113232,dpt,coll10a1a,p3h4,adamts12,col5a3a,coll6a1,ttn.2,tnnt2e,igfn1.4                                                                                                                                                                                                                                              |  |
| GO:0006090                                                                     | pyruvate metabolic process             | -6.76       | 14            | ldha,gapdh,aldoaa,bpgm,pgam2,gck,pygma,gpd1b,ppp1r3ca,slc25a55b,gbgt11l,gatm,teca,rfsd                                                                                                                                                                                                                                                                                   |  |
| GO:0061061                                                                     | muscle structure development           | -4.28       | 10            | myog,ttn.2,postnb,loxa,pygma,tnnt2e,pgam2,myl2b,igfn1.4,tnni4b.2                                                                                                                                                                                                                                                                                                         |  |
| GO:0071391                                                                     | cellular response to estrogen stimulus | -3.46       | 3             | hpxa,vtg6,vtg2                                                                                                                                                                                                                                                                                                                                                           |  |
| GO:0031099                                                                     | regeneration                           | -2.71       | 5             | myog,serpinh1b,colla1a,coll10a1a,gck                                                                                                                                                                                                                                                                                                                                     |  |
| GO:0007517                                                                     | muscle organ development               | -2.71       | 5             | myog,ttn.2,postnb,loxa,pygma                                                                                                                                                                                                                                                                                                                                             |  |

**Supplementary Table 4. Results of statistical analysis.**

| Figure                       | Data                         | Significance probability  |
|------------------------------|------------------------------|---------------------------|
|                              |                              | Shapiro-Wilk-test         |
| Figure 4B                    | Group-housed fish            | 0.346                     |
|                              | Single-housed fish           | 0.190                     |
| Figure 5B_Testis             | Group-housed fish_Stage II   | 0.404                     |
|                              | Group-housed fish_Stage III  | 0.249                     |
|                              | Group-housed fish_Stage IV   | 0.837                     |
|                              | Single-housed fish_Stage II  | 0.656                     |
|                              | Single-housed fish_Stage III | 0.767                     |
|                              | Single-housed fish_Stage IV  | 0.210                     |
|                              | Figure 5B_Ovary              | Group-housed fish_Stage I |
| Group-housed fish_Stage II   |                              | 0.976                     |
| Group-housed fish_Stage III  |                              | 0.976                     |
| Group-housed fish_Stage IV   |                              | 0.915                     |
| Single-housed fish_Stage I   |                              | 0.415                     |
| Single-housed fish_Stage II  |                              | 0.931                     |
| Single-housed fish_Stage III |                              | 0.034                     |
| Single-housed fish_Stage IV  |                              | 0.754                     |

| Figure           | Comparison                                        | Significance probability |             |                               |                               |
|------------------|---------------------------------------------------|--------------------------|-------------|-------------------------------|-------------------------------|
|                  |                                                   | Kruskal-Wallis test      | Levene-test | t-test (homogeneous variance) | Welch-test (unequal variance) |
| Figure 4B        | Group-housed fish vs Single-housed fish           | -                        | 0.970       | 0.035                         | -                             |
| Figure 5B_Testis | Stage I_Group-housed fish vs Single-housed fish   | -                        | 0.850       | 0.289                         | -                             |
|                  | Stage II_Group-housed fish vs Single-housed fish  | -                        | 0.845       | 0.011                         | -                             |
|                  | Stage III_Group-housed fish vs Single-housed fish | -                        | 0.605       | 0.077                         | -                             |
|                  | Stage IV_Group-housed fish vs Single-housed fish  | -                        | 0.233       | 0.340                         | -                             |
| Figure 5B_Ovary  | Stage I_Group-housed fish vs Single-housed fish   | -                        | 0.025       | -                             | 0.168                         |
|                  | Stage II_Group-housed fish vs Single-housed fish  | -                        | 0.213       | 0.886                         | -                             |
|                  | Stage III_Group-housed fish vs Single-housed fish | 0.014                    | -           | -                             | -                             |
|                  | Stage IV_Group-housed fish vs Single-housed fish  | -                        | 0.123       | 0.109                         | -                             |
